# Supplementary material for: Pleasure attainment or self-realization: the balance between two forms of well-beings are encoded in default mode network
Source: PubMed Central journal article supplement — Soc Cogn Affect Neurosci. 2017 Jul 25;12(10):1678–86. doi: 10.1093/scan/nsx078 (PMC5647812; doi:10.1093/scan/nsx078), 2017-07-25
Supplement: supplement_figure_nsx078.pdf [file supplement_figure_nsx078.pdf]

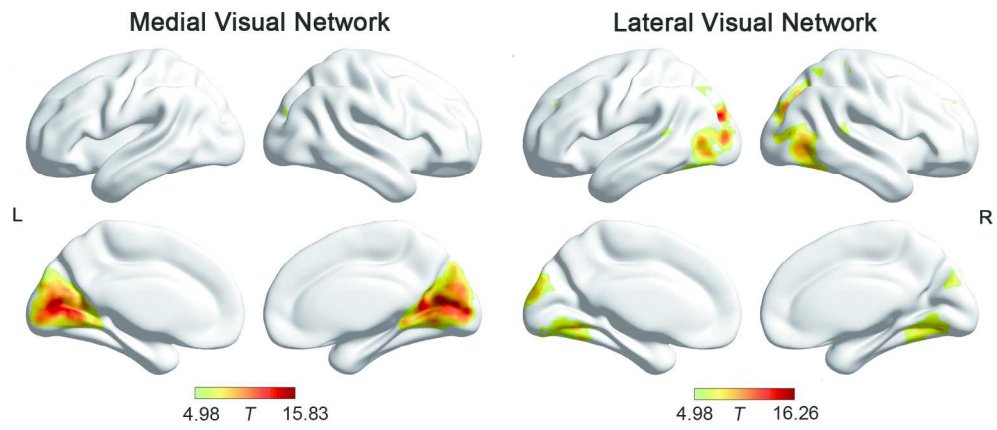

Figure S1. Spatial pattern of medial and lateral visual networks. Abbreviation: L = left, R = Right.

170x75mm (300 x 300 DPI)
